# Supplementary material
Source: HighWire-hosted journal article supplement (https://erj.ersjournals.com/content/56/6/2002857)
Supplement: inline-supplementary-material-1 [file inline-supplementary-material-1.pdf]

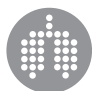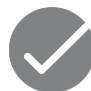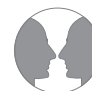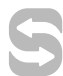

SHAREABLE PDF

# COVID-19 and biologics in severe asthma: data from the Belgian Severe Asthma Registry

Shane Hanon<sup>1</sup>, Guy Brusselle <sup>2</sup>, Maud Deschamphelleire<sup>3</sup>, Renaud Louis<sup>4</sup>, Alain Michils<sup>5</sup>, Rudi Peché<sup>6</sup>, Charles Pilette<sup>7</sup>, Peter Rummens<sup>8</sup>, Daniel Schuermans <sup>1</sup>, Hélène Simonis<sup>3</sup>, Olivier Vandenplas<sup>9</sup> and Florence Schleich<sup>4</sup>

**Affiliations:** <sup>1</sup>Respiratory Division, University Hospital UZ Brussel, Vrije Universiteit Brussel, Brussels, Belgium. <sup>2</sup>Dept of Respiratory Medicine, Ghent University Hospital, Gent, Belgium. <sup>3</sup>Dept of Respiratory Medicine, CHR Citadelle, Liege, Belgium. <sup>4</sup>Dept of Respiratory Medicine, University Hospital of Liege, Liege, Belgium. <sup>5</sup>Chest Dept, Erasme University Hospital, Université Libre de Bruxelles (ULB), Brussels, Belgium. <sup>6</sup>Dept of Respiratory Medicine, ISPPC, CHU Charleroi, Charleroi, Belgium. <sup>7</sup>Dept of Respiratory Medicine, Cliniques Universitaires St-Luc and Institute of Experimental and Clinical Research, Université Catholique de Louvain (UCL), Brussels, Belgium. <sup>8</sup>Dept of Respiratory Medicine, University Hospital Saint-Pierre, Université Libre de Bruxelles, Brussels, Belgium. <sup>9</sup>Dept of Chest Medicine, Centre Hospitalier Universitaire UCL Namur, Cliniques Universitaires de Mont-Godinne, Université Catholique de Louvain, Yvoir, Belgium.

**Correspondence:** Shane Hanon, Respiratory Division, University Hospital UZ Brussel, Laarbeeklaan 101, 1090 Brussels, Belgium. E-mail: shane.hanon@uzbrussel.be

 @ERSpublications

**In a cohort of severe asthma patients, a small number of COVID-19 cases was found; none resulted in death or a very severe disease course. Use of biologics for severe allergic or severe eosinophilic asthma was not associated with a higher risk of COVID-19.** <https://bit.ly/3ndZmyD>

**Cite this article as:** Hanon S, Brusselle G, Deschamphelleire M, *et al.* COVID-19 and biologics in severe asthma: data from the Belgian Severe Asthma Registry. *Eur Respir J* 2020; 56: 2002857 [<https://doi.org/10.1183/13993003.02857-2020>].

This single-page version can be shared freely online.

## To the Editor:

Epidemiological studies suggest that patients with asthma are not at an increased risk of severe coronavirus disease 2019 (COVID-19) caused by the novel coronavirus severe acute respiratory syndrome coronavirus 2 (SARS-CoV-2) [1–3]. Recent studies indicate that the severity of COVID-19 in patients with asthma is likely to depend on multiple factors. A type 2-low asthma phenotype, use of oral corticosteroids and severe asthma could be aggravating factors, while maintenance treatment with inhaled corticosteroids (ICS) and good asthma control are probably protective [4]. However, there is currently scarce information on the risk associated with COVID-19 in subjects with severe asthma and/or the use of biologics. Since eosinopenia is a biomarker for the severity of COVID-19 [5], the eosinophil depletion induced by anti-IL5 and anti-IL5 receptor blocking monoclonal antibodies raises concern in patients and their treating physicians. The handful of case reports about patients using the monoclonal antibodies omalizumab [6], benralizumab [7] or dupilumab for atopic dermatitis do offer a reassuring picture, but larger studies performed in patients with asthma are urgently needed. In immune-mediated inflammatory diseases, such as rheumatoid arthritis and psoriasis, treatment with biologics was not associated with worse COVID-19 outcomes [8]. Positioning papers and guidelines recommend asthma patients to maintain their regular treatments,

including asthma biologics for those who qualify for them [9, 10], but epidemiological or clinical research data are scarce [1, 11].
